# Supplementary figures and images for: Forkhead Box Protein P3 (FOXP3) Represses ATF3 Transcriptional Activity
Source: MDPI journal article supplement (doi:10.3390/ijms222111400), 2021-10-22

Foxp3 tetoff and overexpression data

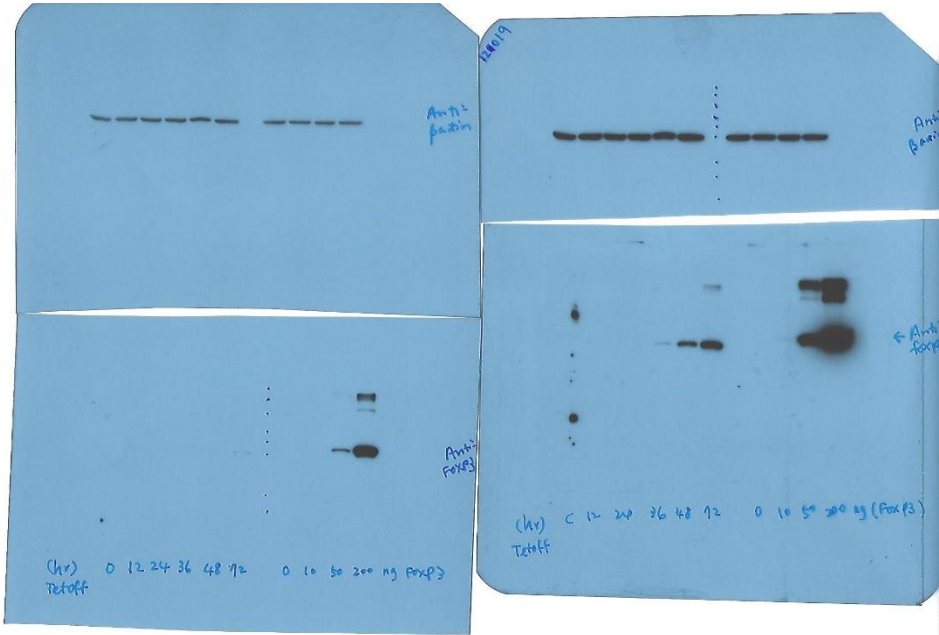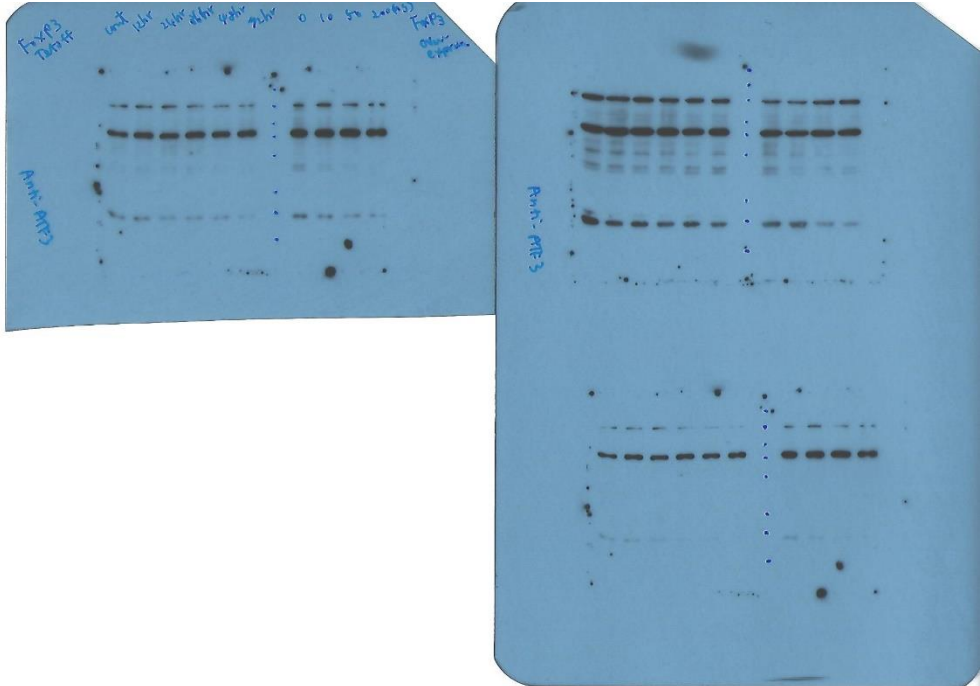

Foxp3 siRNA data

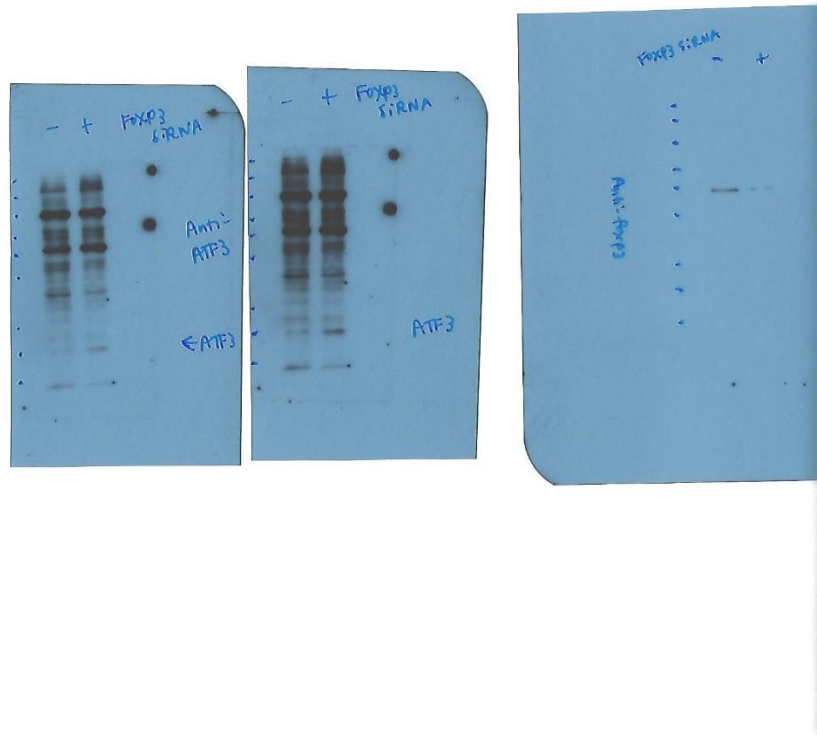

WB reporter data (Figures 2 and 4)

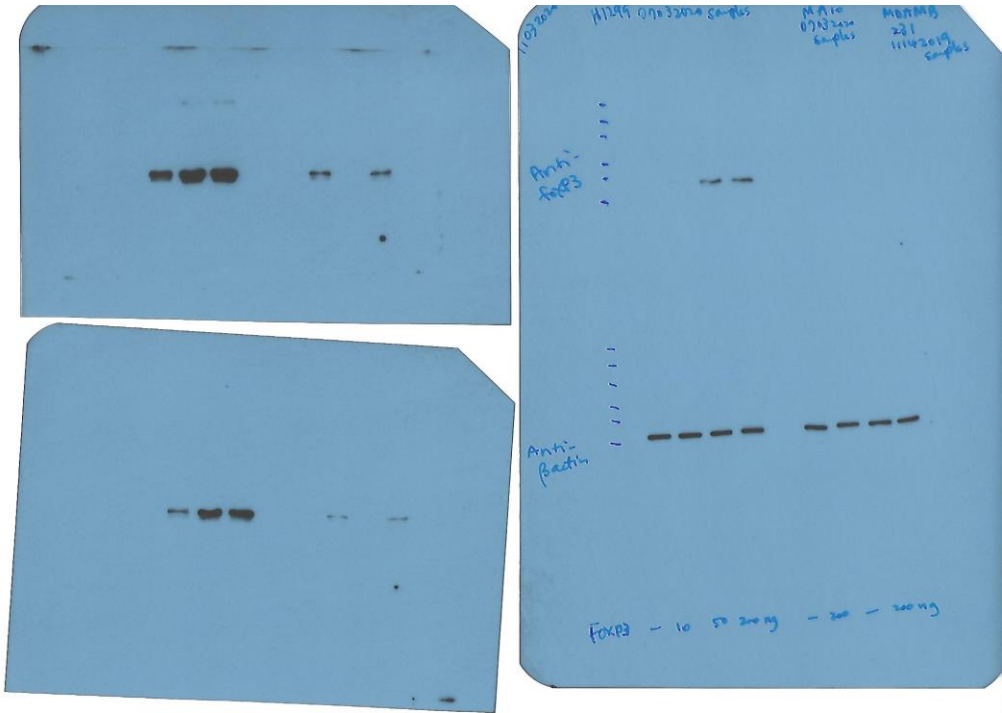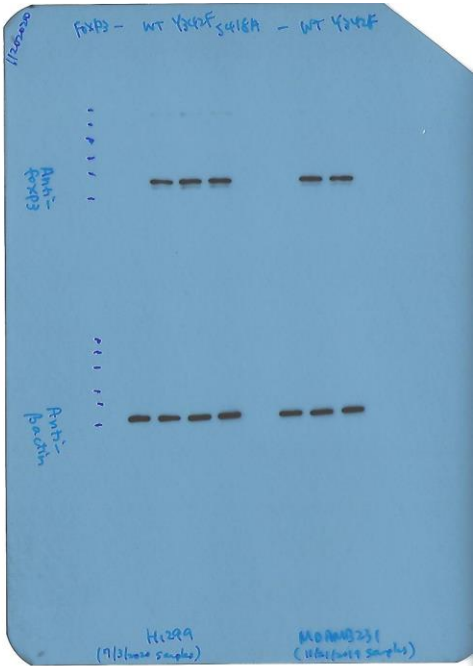

Supplement: s1 [file s1]
